# Supplementary material for: Effector Mechanisms of CD8+ HLA-DR+ T Cells in Breast Cancer Patients Who Respond to Neoadjuvant Chemotherapy
Source: MDPI journal article supplement (doi:10.3390/cancers13246167), 2021-12-07
Supplement: s1 [file s1]

# Effector Mechanisms of CD8+ HLA-DR+ T Cells in Breast Cancer Patients Who Respond to Neoadjuvant Chemotherapy

Rubén Osuna-Gómez, Cristina Arqueros, Carla Galano, Maria Mulet, Carlos Zamora, Agustí Barnadas and Silvia Vidal

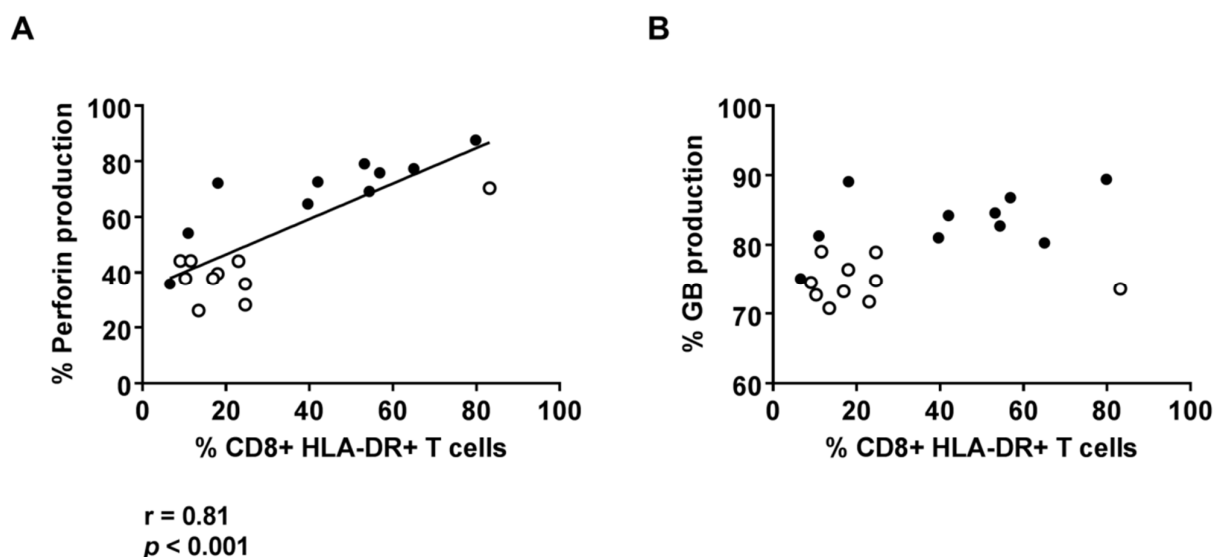

**Figure S1.** Correlation between CD8+ HLA-DR+ T cells in peripheral blood and the intracellular percentage of (A) perforin and (B) granzyme B production in cultured healthy donor CD8+ HLA-DR+ T cells. Spots in black correspond to R plasma and spots in white to NR plasma.

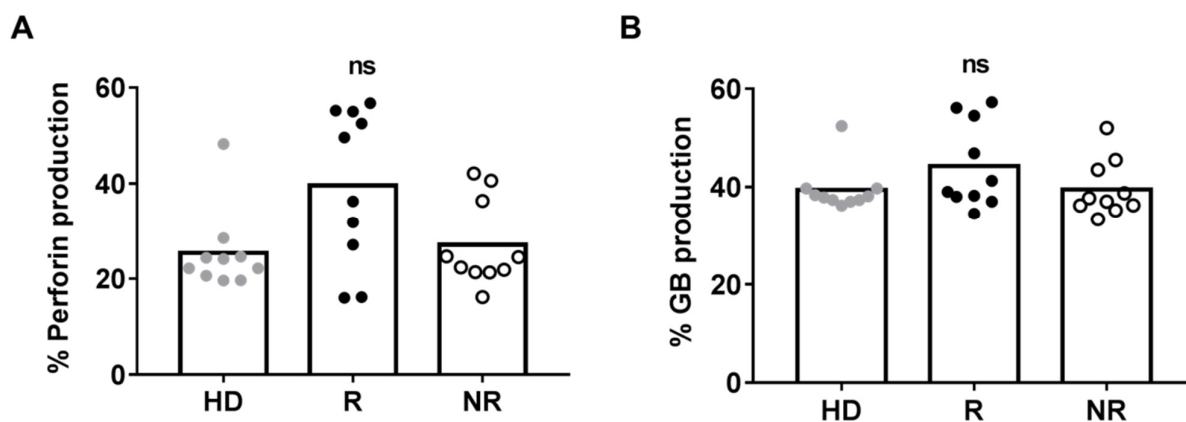

**Figure S2.** Cytotoxic function of CD8+ HLA-DR- T cells after a 72h-culture of HD PBMCs with 25% plasma from R ( $n = 10$ ) and NR ( $n = 10$ ) BC patients. (A) Percentage of CD8+ HLA-DR- T cells producing intracellular perforin and (B) granzyme B as evaluated by flow cytometry analysis.

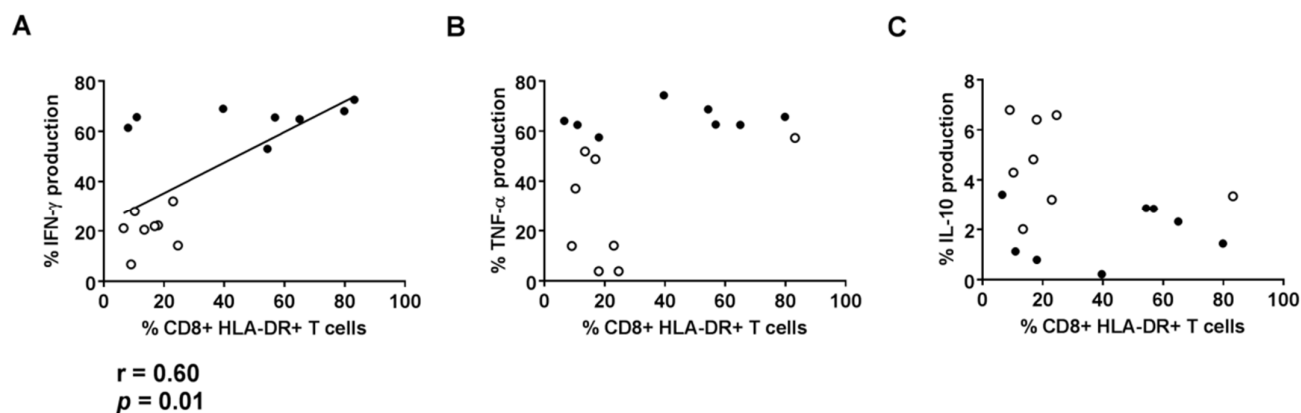

**Figure S3.** Correlation between CD8+ HLA-DR+ T cells in peripheral blood and the intracellular percentage of (A) IFN- $\gamma$ , (B) TNF- $\alpha$  and (C) IL-10 production in cultured CD8+ HLA-DR+ T cells. Spots in black correspond to R plasma and spots in white to NR plasma.

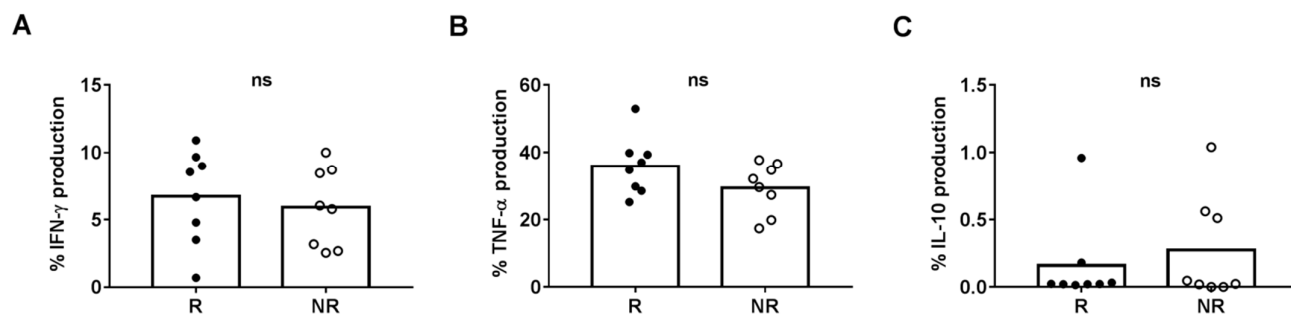

**Figure S4.** Intracellular cytokine production in CD8+ HLA-DR- T cells after a 72h-culture of HD PBMCs with 25% plasma from R ( $n = 8$ ) and NR ( $n = 8$ ). Percentages of CD8+ HLA-DR- T cells with intracellular (A) IFN- $\gamma$ , (B) TNF- $\alpha$  and (C) IL-10 were evaluated by flow cytometry analysis.
